# Supplementary material
Source: Springer Nature journal article supplement (https://www.springermedizin.de/resource/supplementary/12874_2011_758_MOESM1_ESM.pdf/9432944)
Supplement: MOESM1 [file 9432944]

## Appendix: Present Value of Lifetime Earnings by Country

### Australia

#### Present Value of Lifetime Earnings

| Age Group | Male      | Female  |
|-----------|-----------|---------|
| 20-24     | 1,271,166 | 694,269 |
| 25-29     | 1,204,580 | 644,790 |
| 30-34     | 1,109,442 | 592,454 |
| 35-39     | 995,193   | 536,991 |
| 40-44     | 863,703   | 467,048 |
| 45-49     | 713,129   | 374,284 |
| 50-54     | 541,983   | 267,335 |
| 55-59     | 360,800   | 160,011 |
| 60-64     | 193,441   | 72,088  |
| 65-69     | 71,438    | 20,552  |
| 70-74     | 16,400    | 3,072   |
| 75+       | 4,302     | 806     |

Estimates do not include household productivity costs

Wages reported in 2009 Australian Dollars

## Appendix: Present Value of Lifetime Earnings by Country

### Belgium

#### Present Value of Lifetime Earnings

| Age Group | Male    | Female  |
|-----------|---------|---------|
| 20-24     | 567,136 | 433,007 |
| 25-29     | 570,013 | 430,071 |
| 30-34     | 529,172 | 390,253 |
| 35-39     | 473,240 | 339,633 |
| 40-44     | 403,368 | 279,129 |
| 45-49     | 316,736 | 205,848 |
| 50-54     | 213,491 | 126,803 |
| 55-59     | 108,341 | 56,839  |
| 60-64     | 35,759  | 14,250  |
| 65-69     | 9,876   | 2,928   |
| 70-74     | 3,199   | 936     |
| 75+       | 550     | 227     |

Estimates do not include household productivity costs

Wages reported in 2009 Euros

## Appendix: Present Value of Lifetime Earnings by Country

### Brazil

#### Present Value of Lifetime Earnings

| Age Group | Male    | Female  |
|-----------|---------|---------|
| 20-24     | 279,321 | 207,520 |
| 25-29     | 271,326 | 198,429 |
| 30-34     | 256,684 | 183,860 |
| 35-39     | 237,203 | 165,129 |
| 40-44     | 213,150 | 141,933 |
| 45-49     | 183,955 | 114,480 |
| 50-54     | 150,380 | 85,824  |
| 55-59     | 114,012 | 58,996  |
| 60-64     | 77,224  | 36,553  |
| 65-69     | 44,267  | 20,132  |
| 70-74     | 18,215  | 7,854   |
| 75+       | 3,376   | 1,322   |

Estimates do not include household productivity costs

Wages reported in 2009 Brazilian Real

## Appendix: Present Value of Lifetime Earnings by Country

### Canada

#### Present Value of Lifetime Earnings

| Age Group | Male      | Female  |
|-----------|-----------|---------|
| 20-24     | 960,465   | 547,279 |
| 25-29     | 1,024,527 | 575,003 |
| 30-34     | 975,543   | 539,721 |
| 35-39     | 911,311   | 496,875 |
| 40-44     | 833,259   | 442,711 |
| 45-49     | 715,472   | 365,926 |
| 50-54     | 535,884   | 261,502 |
| 55-59     | 340,652   | 152,791 |
| 60-64     | 159,788   | 60,044  |
| 65-69     | 52,733    | 12,725  |
| 70-74     | 25,687    | 6,198   |
| 75+       | 6,795     | 1,640   |

Estimates do not include household productivity costs

Wages reported in 2009 Canadian dollars

## Appendix: Present Value of Lifetime Earnings by Country

### China

#### Present Value of Lifetime Earnings

| Age Group | Male    | Female  |
|-----------|---------|---------|
| 20-24     | 202,633 | 176,887 |
| 25-29     | 215,826 | 171,281 |
| 30-34     | 214,301 | 151,533 |
| 35-39     | 209,154 | 135,169 |
| 40-44     | 198,804 | 120,302 |
| 45-49     | 179,987 | 99,800  |
| 50-54     | 148,899 | 70,111  |
| 55-59     | 104,193 | 39,061  |
| 60-64     | 56,746  | 16,021  |
| 65-69     | 25,387  | 5,787   |
| 70-74     | 8,515   | 1,970   |
| 75+       | 1,198   | 292     |

Estimates do not include household productivity costs

Wages reported in 2009 Chinese Yuan Renminbi

## Appendix: Present Value of Lifetime Earnings by Country

### Colombia

#### Present Value of Lifetime Earnings

| Age Group | Male       | Female    |
|-----------|------------|-----------|
| 20-24     | 14,213,808 | 6,506,218 |
| 25-29     | 14,698,300 | 6,645,494 |
| 30-34     | 14,325,630 | 6,405,626 |
| 35-39     | 13,762,675 | 6,043,280 |
| 40-44     | 12,912,277 | 5,495,922 |
| 45-49     | 11,627,666 | 4,669,083 |
| 50-54     | 9,687,134  | 3,420,061 |
| 55-59     | 7,290,396  | 1,934,947 |
| 60-64     | 6,309,446  | 1,674,593 |
| 65-69     | 4,827,625  | 1,281,302 |
| 70-74     | 2,589,187  | 687,197   |
| 75+       | 729,461    | 193,607   |

Estimates do not include household productivity costs

Wages reported in 2009 Colombian pesos

## Appendix: Present Value of Lifetime Earnings by Country

### Czech Republic

#### Present Value of Lifetime Earnings

| Age Group | Male      | Female    |
|-----------|-----------|-----------|
| 20-24     | 2,680,201 | 2,058,433 |
| 25-29     | 2,888,697 | 2,264,361 |
| 30-34     | 2,839,099 | 2,338,214 |
| 35-39     | 2,692,947 | 2,372,266 |
| 40-44     | 2,466,794 | 2,203,590 |
| 45-49     | 2,143,950 | 1,814,339 |
| 50-54     | 1,687,851 | 1,230,165 |
| 55-59     | 1,062,604 | 579,519   |
| 60-64     | 444,497   | 179,940   |
| 65-69     | 150,194   | 69,403    |
| 70-74     | 47,381    | 19,316    |
| 75+       | 6,030     | 1,573     |

Estimates do not include household productivity costs

Wages reported in 2009 Czech Republic Koruna

## Appendix: Present Value of Lifetime Earnings by Country

### Denmark

#### Present Value of Lifetime Earnings

| Age Group | Male      | Female    |
|-----------|-----------|-----------|
| 20-24     | 7,532,475 | 5,491,911 |
| 25-29     | 7,346,172 | 5,333,564 |
| 30-34     | 6,947,437 | 5,019,524 |
| 35-39     | 6,365,814 | 4,567,745 |
| 40-44     | 5,626,295 | 3,980,768 |
| 45-49     | 4,722,542 | 3,251,821 |
| 50-54     | 3,630,795 | 2,346,261 |
| 55-59     | 2,305,354 | 1,310,745 |
| 60-64     | 1,100,898 | 480,384   |
| 65-69     | 472,264   | 189,398   |
| 70-74     | 140,066   | 47,128    |
| 75+       | 12,928    | 2,838     |

Estimates do not include household productivity costs

Wages reported in 2009 Danish Kroner



## Appendix: Present Value of Lifetime Earnings by Country

### Egypt

#### Present Value of Lifetime Earnings

| Age Group | Male    | Female |
|-----------|---------|--------|
| 20-24     | 199,823 | 50,223 |
| 25-29     | 211,042 | 49,023 |
| 30-34     | 205,692 | 47,050 |
| 35-39     | 194,635 | 44,179 |
| 40-44     | 178,840 | 39,460 |
| 45-49     | 155,713 | 31,613 |
| 50-54     | 125,447 | 22,663 |
| 55-59     | 86,304  | 14,304 |
| 60-64     | 44,650  | 6,045  |
| 65-69     | 23,745  | 3,032  |
| 70-74     | 12,638  | 1,614  |
| 75+       | 3,542   | 452    |

Estimates do not include household productivity costs

Wages reported in 2009 Egyptian Pounds

## Appendix: Present Value of Lifetime Earnings by Country

### Finland

#### Present Value of Lifetime Earnings

| Age Group | Male    | Female  |
|-----------|---------|---------|
| 20-24     | 441,924 | 320,463 |
| 25-29     | 446,952 | 325,690 |
| 30-34     | 431,780 | 322,656 |
| 35-39     | 404,518 | 312,272 |
| 40-44     | 364,633 | 289,032 |
| 45-49     | 312,994 | 247,538 |
| 50-54     | 242,646 | 188,046 |
| 55-59     | 156,138 | 112,871 |
| 60-64     | 73,164  | 43,106  |
| 65-69     | 25,486  | 7,650   |
| 70-74     | 9,315   | 2,196   |
| 75+       | 2,601   | 613     |

Estimates do not include household productivity costs

Wages reported in 2009 Euros

## Appendix: Present Value of Lifetime Earnings by Country

### France

#### Present Value of Lifetime Earnings

| Age Group | Male    | Female  |
|-----------|---------|---------|
| 20-24     | 709,967 | 513,448 |
| 25-29     | 684,999 | 495,958 |
| 30-34     | 620,895 | 451,317 |
| 35-39     | 541,563 | 395,698 |
| 40-44     | 448,668 | 328,287 |
| 45-49     | 341,079 | 248,510 |
| 50-54     | 219,300 | 157,757 |
| 55-59     | 101,920 | 70,859  |
| 60-64     | 30,417  | 17,526  |
| 65-69     | 8,578   | 3,683   |
| 70-74     | 2,121   | 734     |
| 75+       | 178     | 59      |

Estimates do not include household productivity costs

Wages reported in 2009 Euros

## Appendix: Present Value of Lifetime Earnings by Country

### Germany

#### Present Value of Lifetime Earnings

| Age Group | Male    | Female  |
|-----------|---------|---------|
| 20-24     | 749,279 | 489,744 |
| 25-29     | 739,217 | 475,962 |
| 30-34     | 700,304 | 449,281 |
| 35-39     | 637,822 | 412,974 |
| 40-44     | 557,755 | 360,539 |
| 45-49     | 459,442 | 290,449 |
| 50-54     | 341,640 | 205,338 |
| 55-59     | 206,460 | 112,586 |
| 60-64     | 83,592  | 38,503  |
| 65-69     | 21,980  | 8,753   |
| 70-74     | 7,143   | 2,486   |
| 75+       | 833     | 201     |

Estimates do not include household productivity costs

Wages reported in 2009 Euros

## Appendix: Present Value of Lifetime Earnings by Country

### India

#### Present Value of Lifetime Earnings

| Age Group | Male    | Female  |
|-----------|---------|---------|
| 20-24     | 462,821 | 189,944 |
| 25-29     | 480,238 | 210,247 |
| 30-34     | 475,296 | 218,157 |
| 35-39     | 462,776 | 212,727 |
| 40-44     | 441,539 | 192,864 |
| 45-49     | 408,132 | 162,927 |
| 50-54     | 354,499 | 119,883 |
| 55-59     | 277,836 | 65,703  |
| 60-64     | 181,310 | 16,512  |
| 65-69     | 96,659  | 6,699   |
| 70-74     | 54,819  | 3,799   |
| 75+       | 16,056  | 1,113   |

Estimates do not include household productivity costs

Wages reported in 2009 Rupees

## Appendix: Present Value of Lifetime Earnings by Country

### Indonesia

#### Present Value of Lifetime Earnings

| Age Group | Male        | Female     |
|-----------|-------------|------------|
| 20-24     | 180,663,682 | 83,746,245 |
| 25-29     | 182,342,206 | 83,820,651 |
| 30-34     | 178,499,401 | 83,716,368 |
| 35-39     | 171,400,276 | 82,581,036 |
| 40-44     | 161,878,485 | 78,415,099 |
| 45-49     | 147,923,067 | 70,959,031 |
| 50-54     | 130,217,773 | 60,405,173 |
| 55-59     | 107,464,804 | 47,865,286 |
| 60-64     | 81,956,012  | 34,503,482 |
| 65-69     | 53,974,110  | 21,336,623 |
| 70-74     | 23,934,487  | 8,504,041  |
| 75+       | 4,932,769   | 1,395,253  |

Estimates do not include household productivity costs

Wages reported in 2009 Rupiah

## Appendix: Present Value of Lifetime Earnings by Country

### Israel

#### Present Value of Lifetime Earnings

| Age Group | Male      | Female    |
|-----------|-----------|-----------|
| 20-24     | 1,898,562 | 1,606,249 |
| 25-29     | 1,906,853 | 1,569,960 |
| 30-34     | 1,778,203 | 1,438,984 |
| 35-39     | 1,619,349 | 1,283,505 |
| 40-44     | 1,419,505 | 1,097,379 |
| 45-49     | 1,192,485 | 886,667   |
| 50-54     | 936,824   | 650,565   |
| 55-59     | 654,203   | 400,533   |
| 60-64     | 374,897   | 186,152   |
| 65-69     | 151,343   | 52,603    |
| 70-74     | 37,793    | 9,633     |
| 75+       | 9,871     | 2,516     |

Estimates do not include household productivity costs

Wages reported in 2009 New Shekels

## Appendix: Present Value of Lifetime Earnings by Country

### Japan

#### Present Value of Lifetime Earnings

| Age Group | Male       | Female     |
|-----------|------------|------------|
| 20-24     | 86,412,301 | 41,599,192 |
| 25-29     | 85,824,989 | 39,205,704 |
| 30-34     | 81,156,907 | 36,332,929 |
| 35-39     | 75,173,964 | 33,926,695 |
| 40-44     | 67,881,906 | 30,670,446 |
| 45-49     | 59,022,790 | 25,873,079 |
| 50-54     | 48,404,274 | 19,867,889 |
| 55-59     | 36,014,535 | 13,556,621 |
| 60-64     | 22,941,500 | 7,929,969  |
| 65-69     | 11,918,178 | 3,880,166  |
| 70-74     | 4,278,725  | 1,321,527  |
| 75+       | 591,777    | 151,593    |

Estimates do not include household productivity costs

Wages reported in 2009 Yen



## Appendix: Present Value of Lifetime Earnings by Country

### Mexico

#### Present Value of Lifetime Earnings

| Age Group | Male    | Female  |
|-----------|---------|---------|
| 20-24     | 961,634 | 436,689 |
| 25-29     | 967,982 | 434,073 |
| 30-34     | 937,853 | 418,098 |
| 35-39     | 891,375 | 392,497 |
| 40-44     | 828,305 | 350,091 |
| 45-49     | 745,767 | 292,463 |
| 50-54     | 641,295 | 229,601 |
| 55-59     | 515,354 | 169,173 |
| 60-64     | 379,479 | 113,516 |
| 65-69     | 247,421 | 69,350  |
| 70-74     | 109,151 | 29,287  |
| 75+       | 19,672  | 4,558   |

Estimates do not include household productivity costs

Wages reported in 2009 Nuevo Pesos

## Appendix: Present Value of Lifetime Earnings by Country

### Netherlands

#### Present Value of Lifetime Earnings

| Age Group | Male    | Female  |
|-----------|---------|---------|
| 20-24     | 810,081 | 519,393 |
| 25-29     | 783,314 | 490,285 |
| 30-34     | 730,204 | 448,310 |
| 35-39     | 661,024 | 398,330 |
| 40-44     | 576,337 | 338,621 |
| 45-49     | 474,635 | 265,969 |
| 50-54     | 353,124 | 183,084 |
| 55-59     | 214,646 | 98,911  |
| 60-64     | 93,717  | 35,389  |
| 65-69     | 33,221  | 9,071   |
| 70-74     | 10,833  | 2,442   |
| 75+       | 1,182   | 167     |

Estimates do not include household productivity costs

Wages reported in 2009 Euros

## Appendix: Present Value of Lifetime Earnings by Country

### New Zealand

#### Present Value of Lifetime Earnings

| Age Group | Male      | Female  |
|-----------|-----------|---------|
| 20-24     | 1,243,564 | 827,542 |
| 25-29     | 1,188,075 | 784,337 |
| 30-34     | 1,099,636 | 728,315 |
| 35-39     | 994,938   | 665,736 |
| 40-44     | 877,071   | 587,263 |
| 45-49     | 742,828   | 487,406 |
| 50-54     | 589,299   | 371,020 |
| 55-59     | 419,449   | 244,938 |
| 60-64     | 244,853   | 128,883 |
| 65-69     | 105,945   | 48,802  |
| 70-74     | 30,899    | 11,813  |
| 75+       | 2,414     | 673     |

Estimates do not include household productivity costs

Wages reported in 2009 New Zealand Dollars

## Appendix: Present Value of Lifetime Earnings by Country

### Papua New Guinea

#### Present Value of Lifetime Earnings

| Age Group | Male    | Female  |
|-----------|---------|---------|
| 20-24     | 434,682 | 336,602 |
| 25-29     | 428,922 | 329,532 |
| 30-34     | 413,192 | 317,193 |
| 35-39     | 389,589 | 300,036 |
| 40-44     | 359,614 | 275,487 |
| 45-49     | 323,751 | 246,632 |
| 50-54     | 282,420 | 210,190 |
| 55-59     | 235,845 | 169,045 |
| 60-64     | 178,806 | 124,515 |
| 65-69     | 117,562 | 78,948  |
| 70-74     | 52,514  | 33,608  |
| 75+       | 12,199  | 6,666   |

Estimates do not include household productivity costs

Wages in 2009 Kina

## Appendix: Present Value of Lifetime Earnings by Country

### Poland

#### Present Value of Lifetime Earnings

| Age Group | Male    | Female  |
|-----------|---------|---------|
| 20-24     | 385,444 | 319,814 |
| 25-29     | 404,985 | 340,013 |
| 30-34     | 387,752 | 328,846 |
| 35-39     | 357,487 | 303,988 |
| 40-44     | 313,568 | 259,731 |
| 45-49     | 256,877 | 196,028 |
| 50-54     | 187,669 | 117,785 |
| 55-59     | 112,198 | 51,635  |
| 60-64     | 53,258  | 23,282  |
| 65-69     | 23,903  | 11,053  |
| 70-74     | 8,733   | 3,636   |
| 75+       | 1,233   | 411     |

Estimates do not include household productivity costs

Wages reported in 2009 Zloty

## Appendix: Present Value of Lifetime Earnings by Country

### Portugal

#### Present Value of Lifetime Earnings

| Age Group | Male    | Female  |
|-----------|---------|---------|
| 20-24     | 371,498 | 285,400 |
| 25-29     | 378,641 | 286,554 |
| 30-34     | 362,108 | 268,177 |
| 35-39     | 327,744 | 238,171 |
| 40-44     | 289,248 | 205,914 |
| 45-49     | 241,549 | 167,383 |
| 50-54     | 182,168 | 121,057 |
| 55-59     | 123,227 | 79,148  |
| 60-64     | 74,601  | 45,760  |
| 65-69     | 40,239  | 23,232  |
| 70-74     | 16,453  | 8,666   |
| 75+       | 3,094   | 1,355   |

Estimates do not include household productivity costs

Wages reported in 2009 Euros

## Appendix: Present Value of Lifetime Earnings by Country

### Russia

#### Present Value of Lifetime Earnings

| Age Group | Male      | Female    |
|-----------|-----------|-----------|
| 20-24     | 2,167,946 | 1,919,708 |
| 25-29     | 2,269,820 | 2,060,956 |
| 30-34     | 2,229,695 | 2,070,892 |
| 35-39     | 2,138,349 | 2,008,152 |
| 40-44     | 1,971,583 | 1,828,969 |
| 45-49     | 1,678,651 | 1,473,223 |
| 50-54     | 1,294,494 | 1,003,069 |
| 55-59     | 814,764   | 522,396   |
| 60-64     | 353,398   | 205,963   |
| 65-69     | 132,808   | 69,355    |
| 70-74     | 73,100    | 38,174    |
| 75+       | 20,964    | 10,948    |

Estimates do not include household productivity costs

Wages reported in 2009 Roubles

## Appendix: Present Value of Lifetime Earnings by Country

### South Africa

#### Present Value of Lifetime Earnings

| Age Group | Male      | Female    |
|-----------|-----------|-----------|
| 20-24     | 1,427,651 | 1,119,454 |
| 25-29     | 1,477,586 | 1,139,968 |
| 30-34     | 1,414,340 | 1,076,935 |
| 35-39     | 1,313,361 | 964,661   |
| 40-44     | 1,170,904 | 818,293   |
| 45-49     | 979,394   | 641,945   |
| 50-54     | 742,000   | 431,397   |
| 55-59     | 469,263   | 220,371   |
| 60-64     | 188,395   | 71,258    |
| 65-69     | 25,254    | 12,192    |
| 70-74     | 12,998    | 6,275     |
| 75+       | 3,563     | 1,720     |

Estimates do not include household productivity costs

Wages reported in 2009 Rands



## Appendix: Present Value of Lifetime Earnings by Country

### Spain

#### Present Value of Lifetime Earnings

| Age Group | Male    | Female  |
|-----------|---------|---------|
| 20-24     | 331,631 | 206,137 |
| 25-29     | 359,359 | 216,251 |
| 30-34     | 363,739 | 205,599 |
| 35-39     | 347,997 | 186,506 |
| 40-44     | 316,601 | 160,623 |
| 45-49     | 269,631 | 126,673 |
| 50-54     | 204,258 | 86,278  |
| 55-59     | 121,332 | 45,022  |
| 60-64     | 45,144  | 14,974  |
| 65-69     | 8,748   | 2,599   |
| 70-74     | 1,700   | 539     |
| 75+       | 165     | 48      |

Estimates do not include household productivity costs

Wages reported in 2009 Euros

## Appendix: Present Value of Lifetime Earnings by Country

### Sweden

#### Present Value of Lifetime Earnings

| Age Group | Male    | Female  |
|-----------|---------|---------|
| 20-24     | 565,204 | 429,695 |
| 25-29     | 569,322 | 435,428 |
| 30-34     | 550,036 | 422,890 |
| 35-39     | 516,138 | 397,282 |
| 40-44     | 469,418 | 359,800 |
| 45-49     | 408,372 | 309,681 |
| 50-54     | 330,749 | 244,244 |
| 55-59     | 232,201 | 162,115 |
| 60-64     | 120,650 | 73,861  |
| 65-69     | 39,306  | 15,864  |
| 70-74     | 10,818  | 3,027   |
| 75+       | 0       | 0       |

Estimates do not include household productivity costs

Wages reported in 2009 Krona

## Appendix: Present Value of Lifetime Earnings by Country

### Turkey

#### Present Value of Lifetime Earnings

| Age Group | Male    | Female |
|-----------|---------|--------|
| 20-24     | 199,532 | 71,910 |
| 25-29     | 202,667 | 67,787 |
| 30-34     | 191,579 | 62,424 |
| 35-39     | 173,649 | 55,549 |
| 40-44     | 148,100 | 46,356 |
| 45-49     | 116,921 | 37,201 |
| 50-54     | 86,974  | 28,472 |
| 55-59     | 61,331  | 20,451 |
| 60-64     | 39,846  | 12,828 |
| 65-69     | 23,338  | 6,942  |
| 70-74     | 12,326  | 3,666  |
| 75+       | 3,437   | 1,022  |

Estimates do not include household productivity costs

Wages reported in 2009 Turkish Lira

## Appendix: Present Value of Lifetime Earnings by Country

### United Kingdom

#### Present Value of Lifetime Earnings

| Age Group | Male    | Female  |
|-----------|---------|---------|
| 20-24     | 569,634 | 299,594 |
| 25-29     | 593,391 | 295,060 |
| 30-34     | 588,181 | 279,243 |
| 35-39     | 541,878 | 250,725 |
| 40-44     | 478,200 | 215,231 |
| 45-49     | 386,768 | 171,338 |
| 50-54     | 283,410 | 118,469 |
| 55-59     | 175,117 | 63,649  |
| 60-64     | 78,864  | 22,415  |
| 65-69     | 28,428  | 7,376   |
| 70-74     | 8,373   | 1,824   |
| 75+       | 769     | 109     |

Estimates do not include household productivity costs

Wages reported in 2009 British pounds

## Appendix: Present Value of Lifetime Earnings by Country

### United States

#### Present Value of Lifetime Earnings

| Age Group | Male    | Female  |
|-----------|---------|---------|
| 20-24     | 720,945 | 495,755 |
| 25-29     | 756,786 | 507,390 |
| 30-34     | 749,767 | 489,634 |
| 35-39     | 717,094 | 461,782 |
| 40-44     | 643,216 | 412,985 |
| 45-49     | 551,616 | 348,949 |
| 50-54     | 439,360 | 269,947 |
| 55-59     | 310,316 | 182,061 |
| 60-64     | 177,936 | 99,699  |
| 65-69     | 81,285  | 42,667  |
| 70-74     | 29,625  | 14,215  |
| 75+       | 4,278   | 1,620   |

Estimates do not include household productivity costs

Wages reported in 2009 US dollars
